# Supplementary material for: Genome-resolved evidence for functionally redundant communities and novel nitrogen fixers in the deyin-1 hydrothermal field, Mid-Atlantic Ridge
Source: PubMed Central journal article supplement (PMC8767757; doi:10.1186/s40168-021-01202-x), 2022-01-19

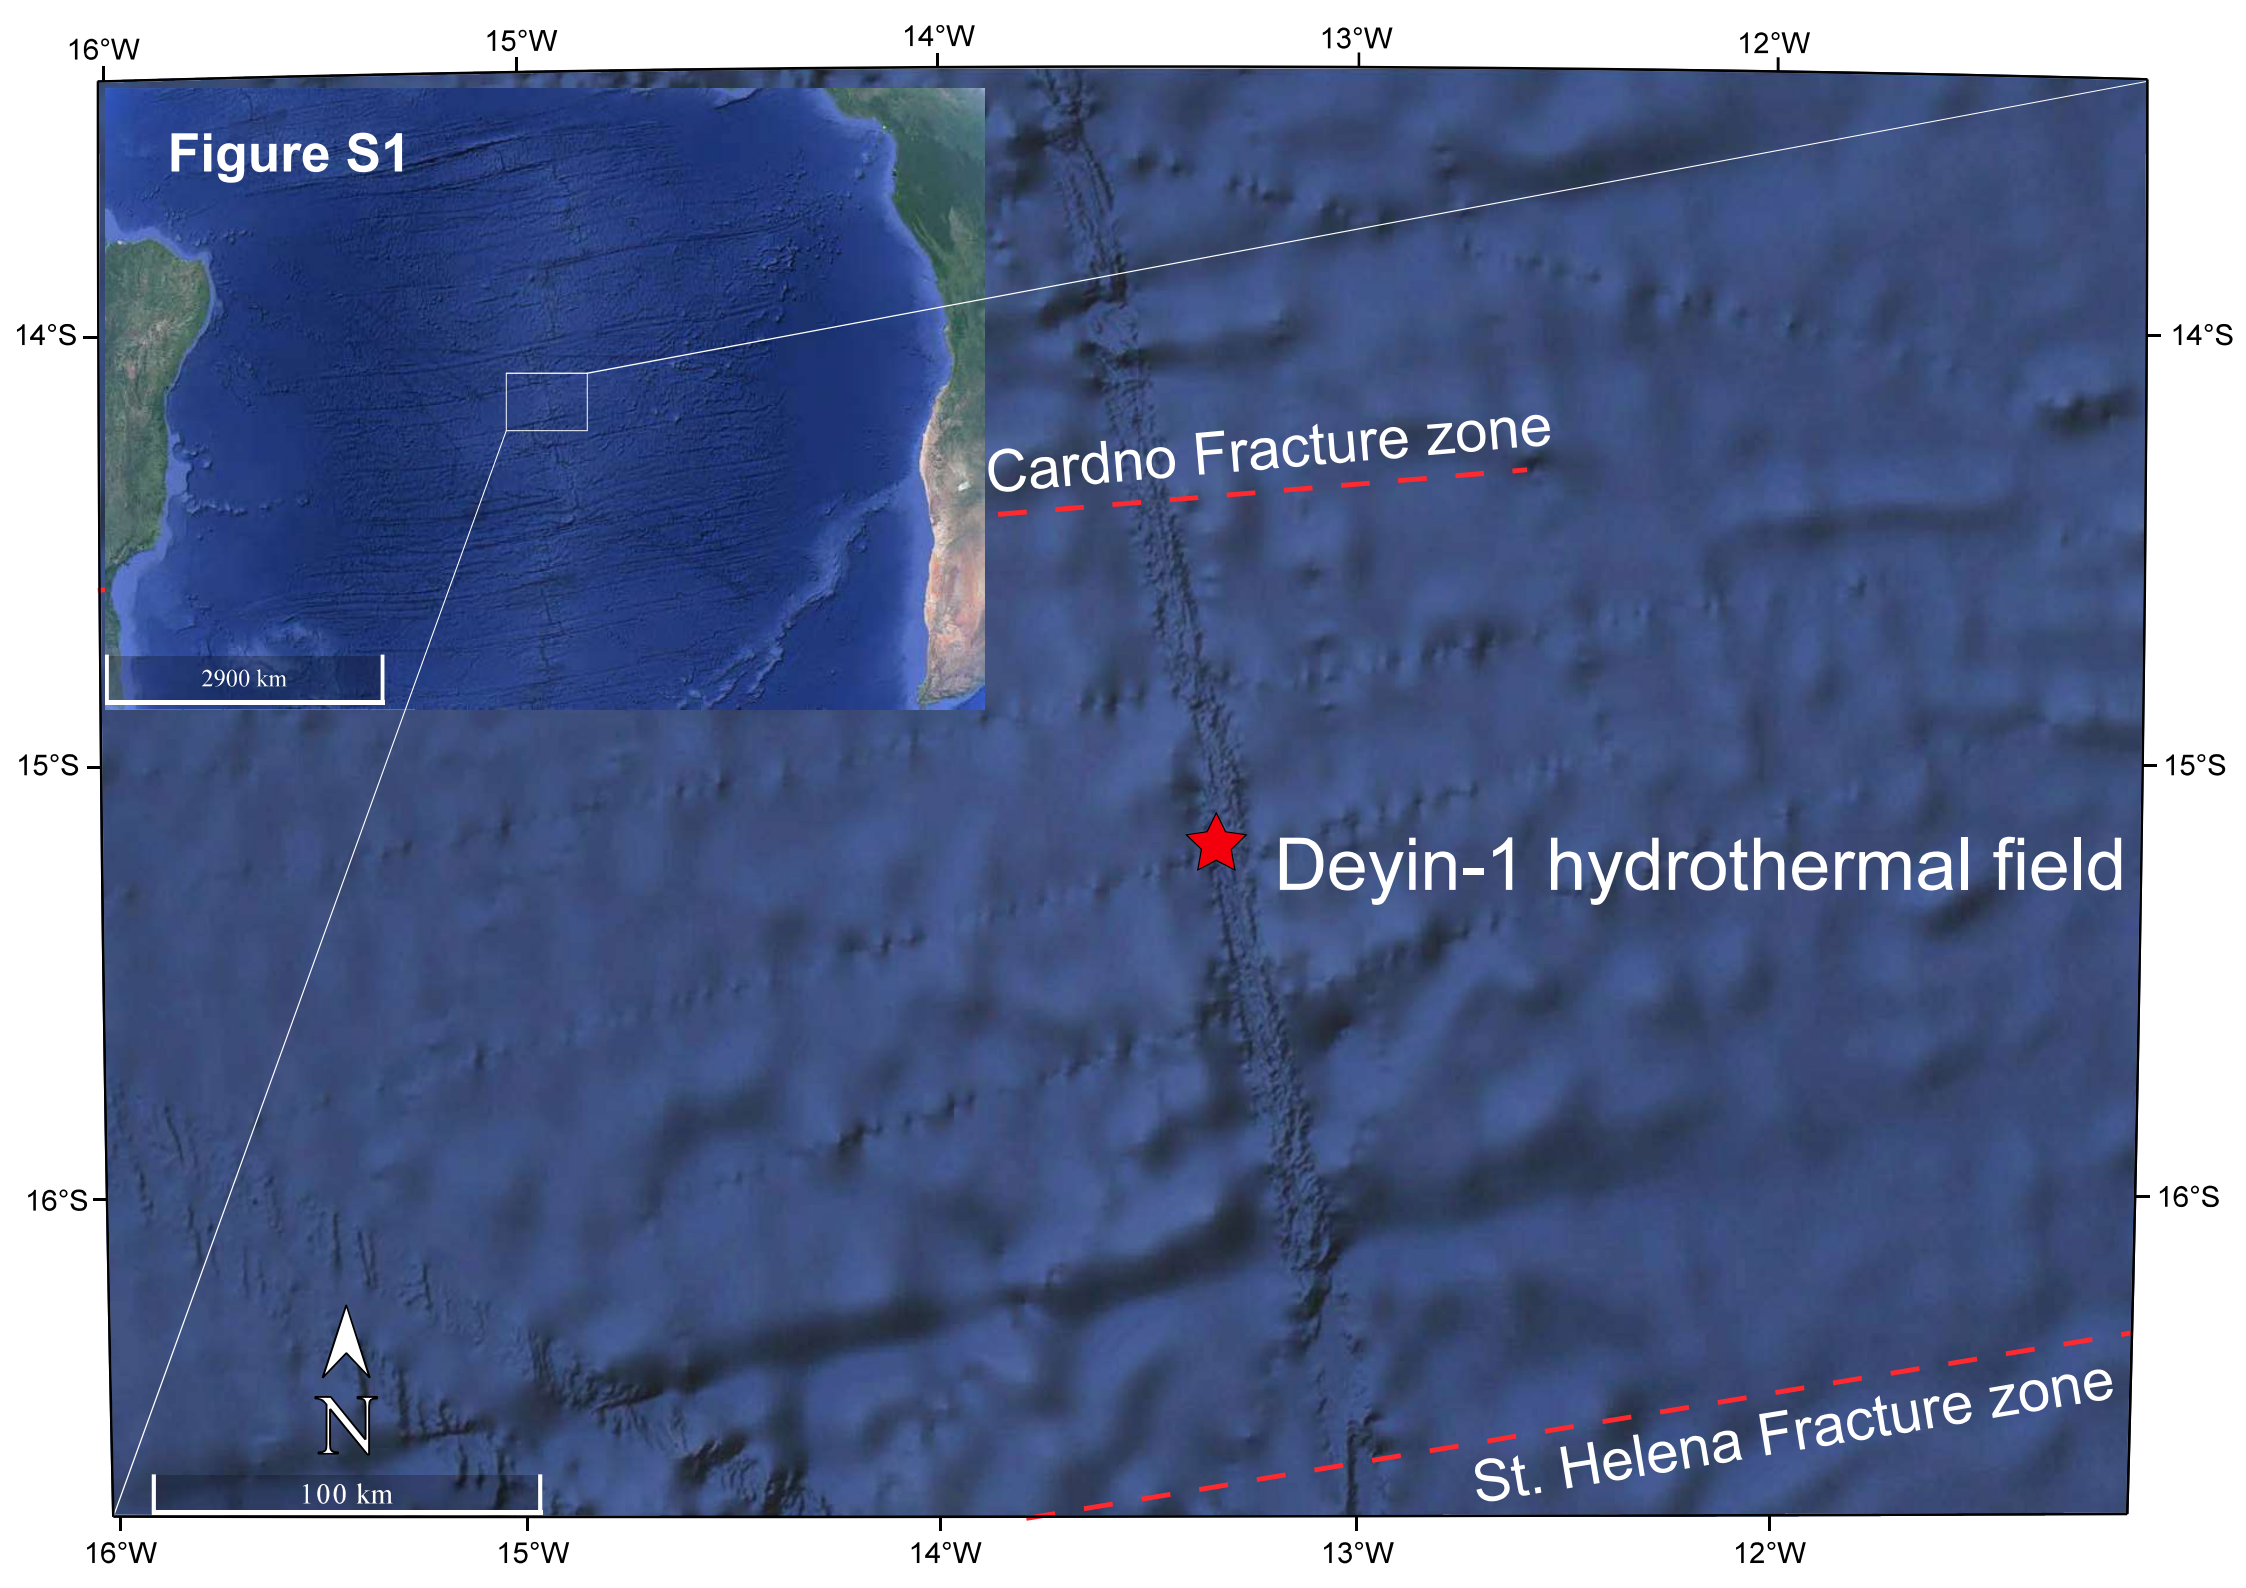

Figure S2

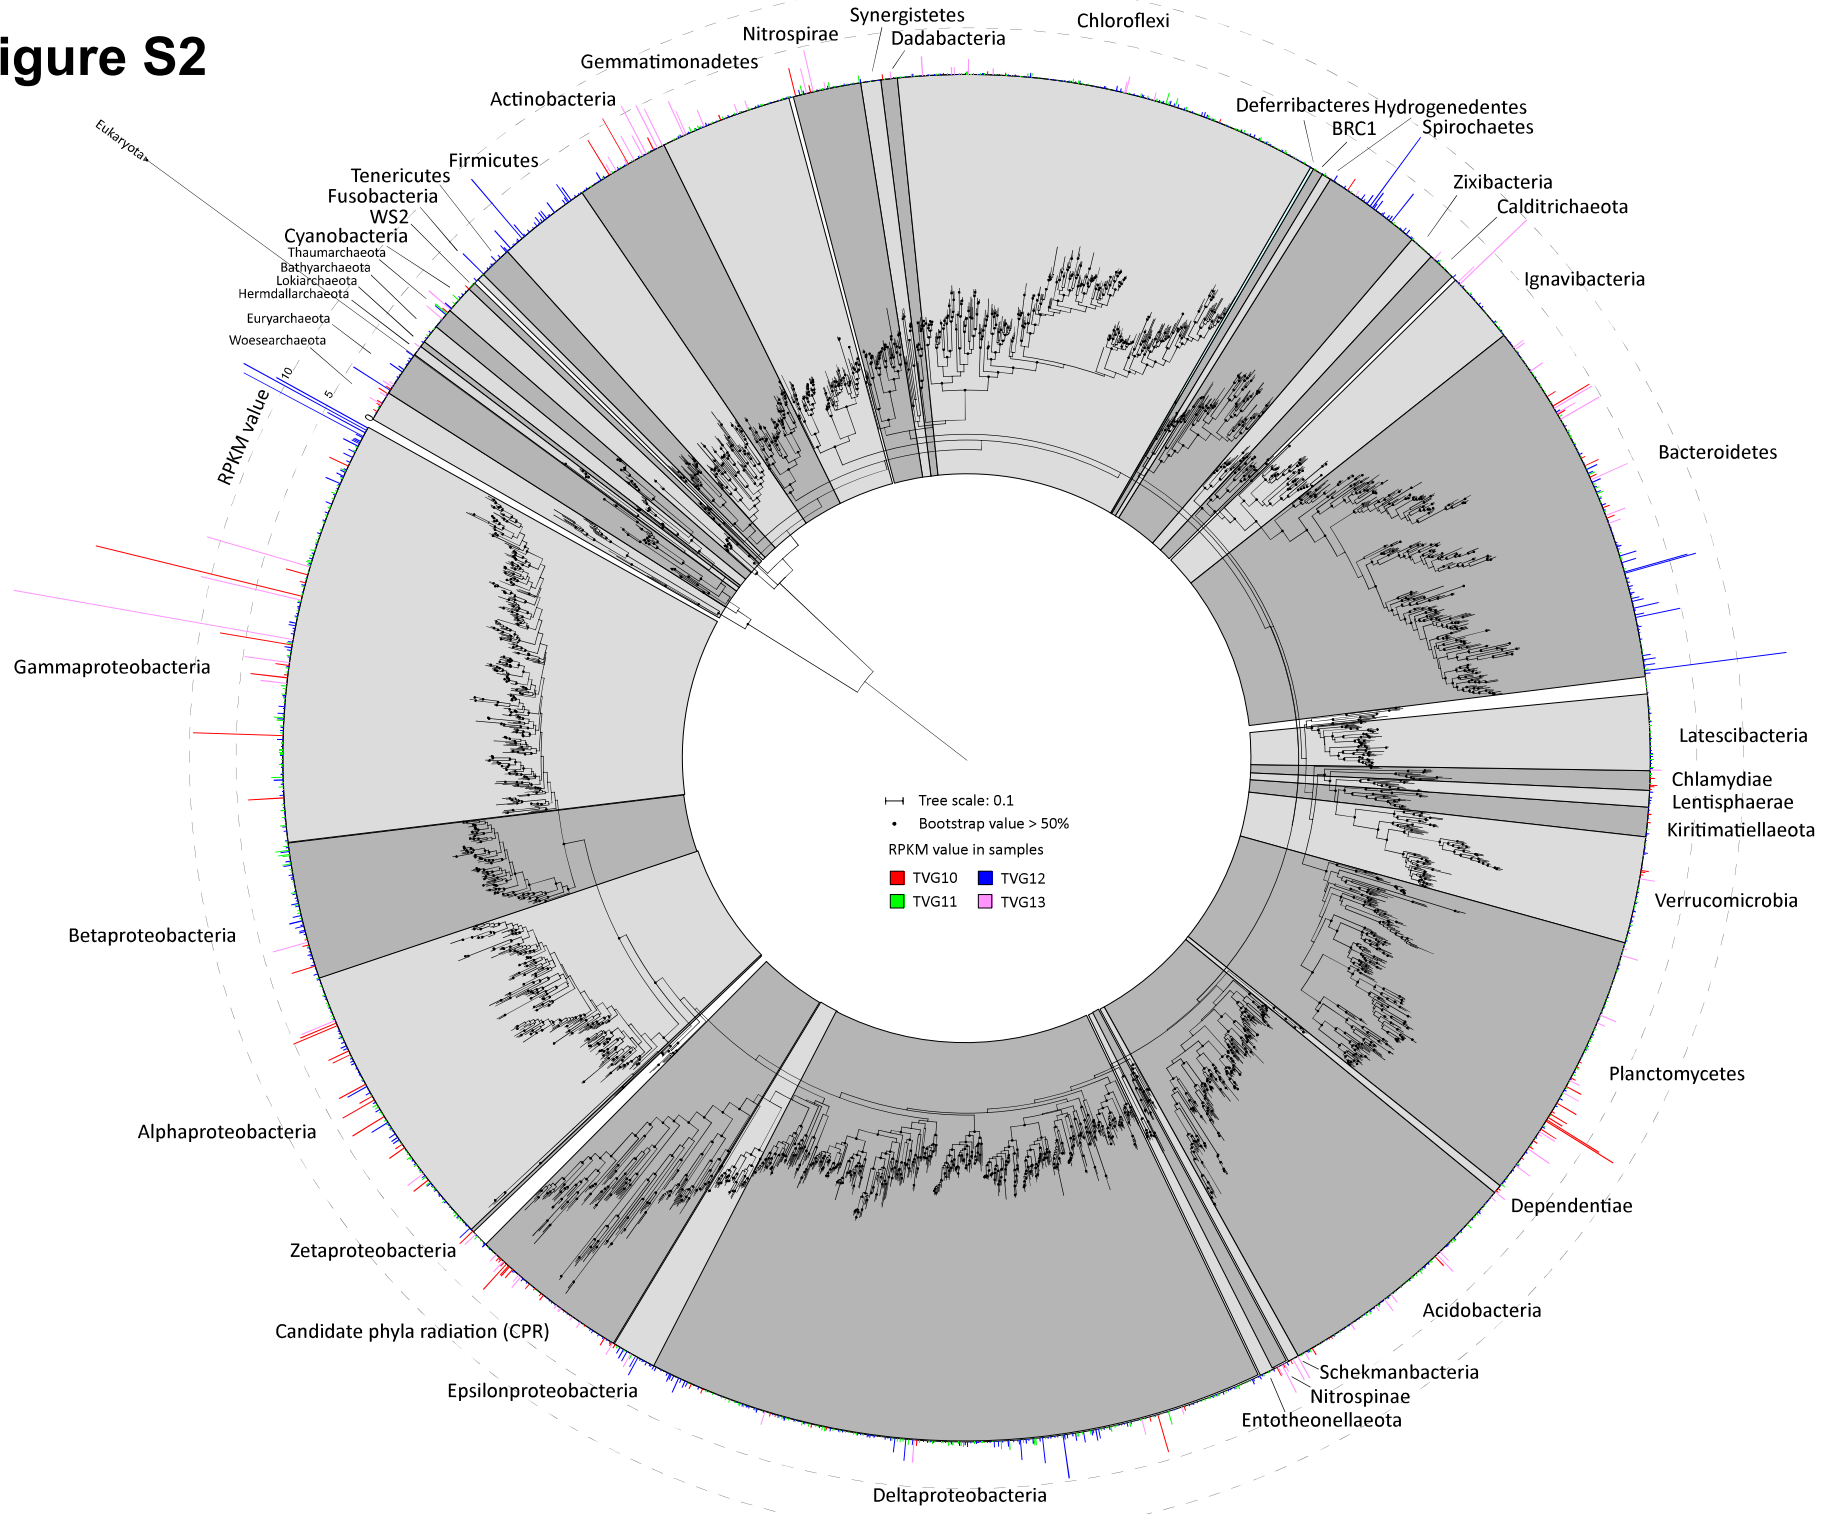

**Figure S3**

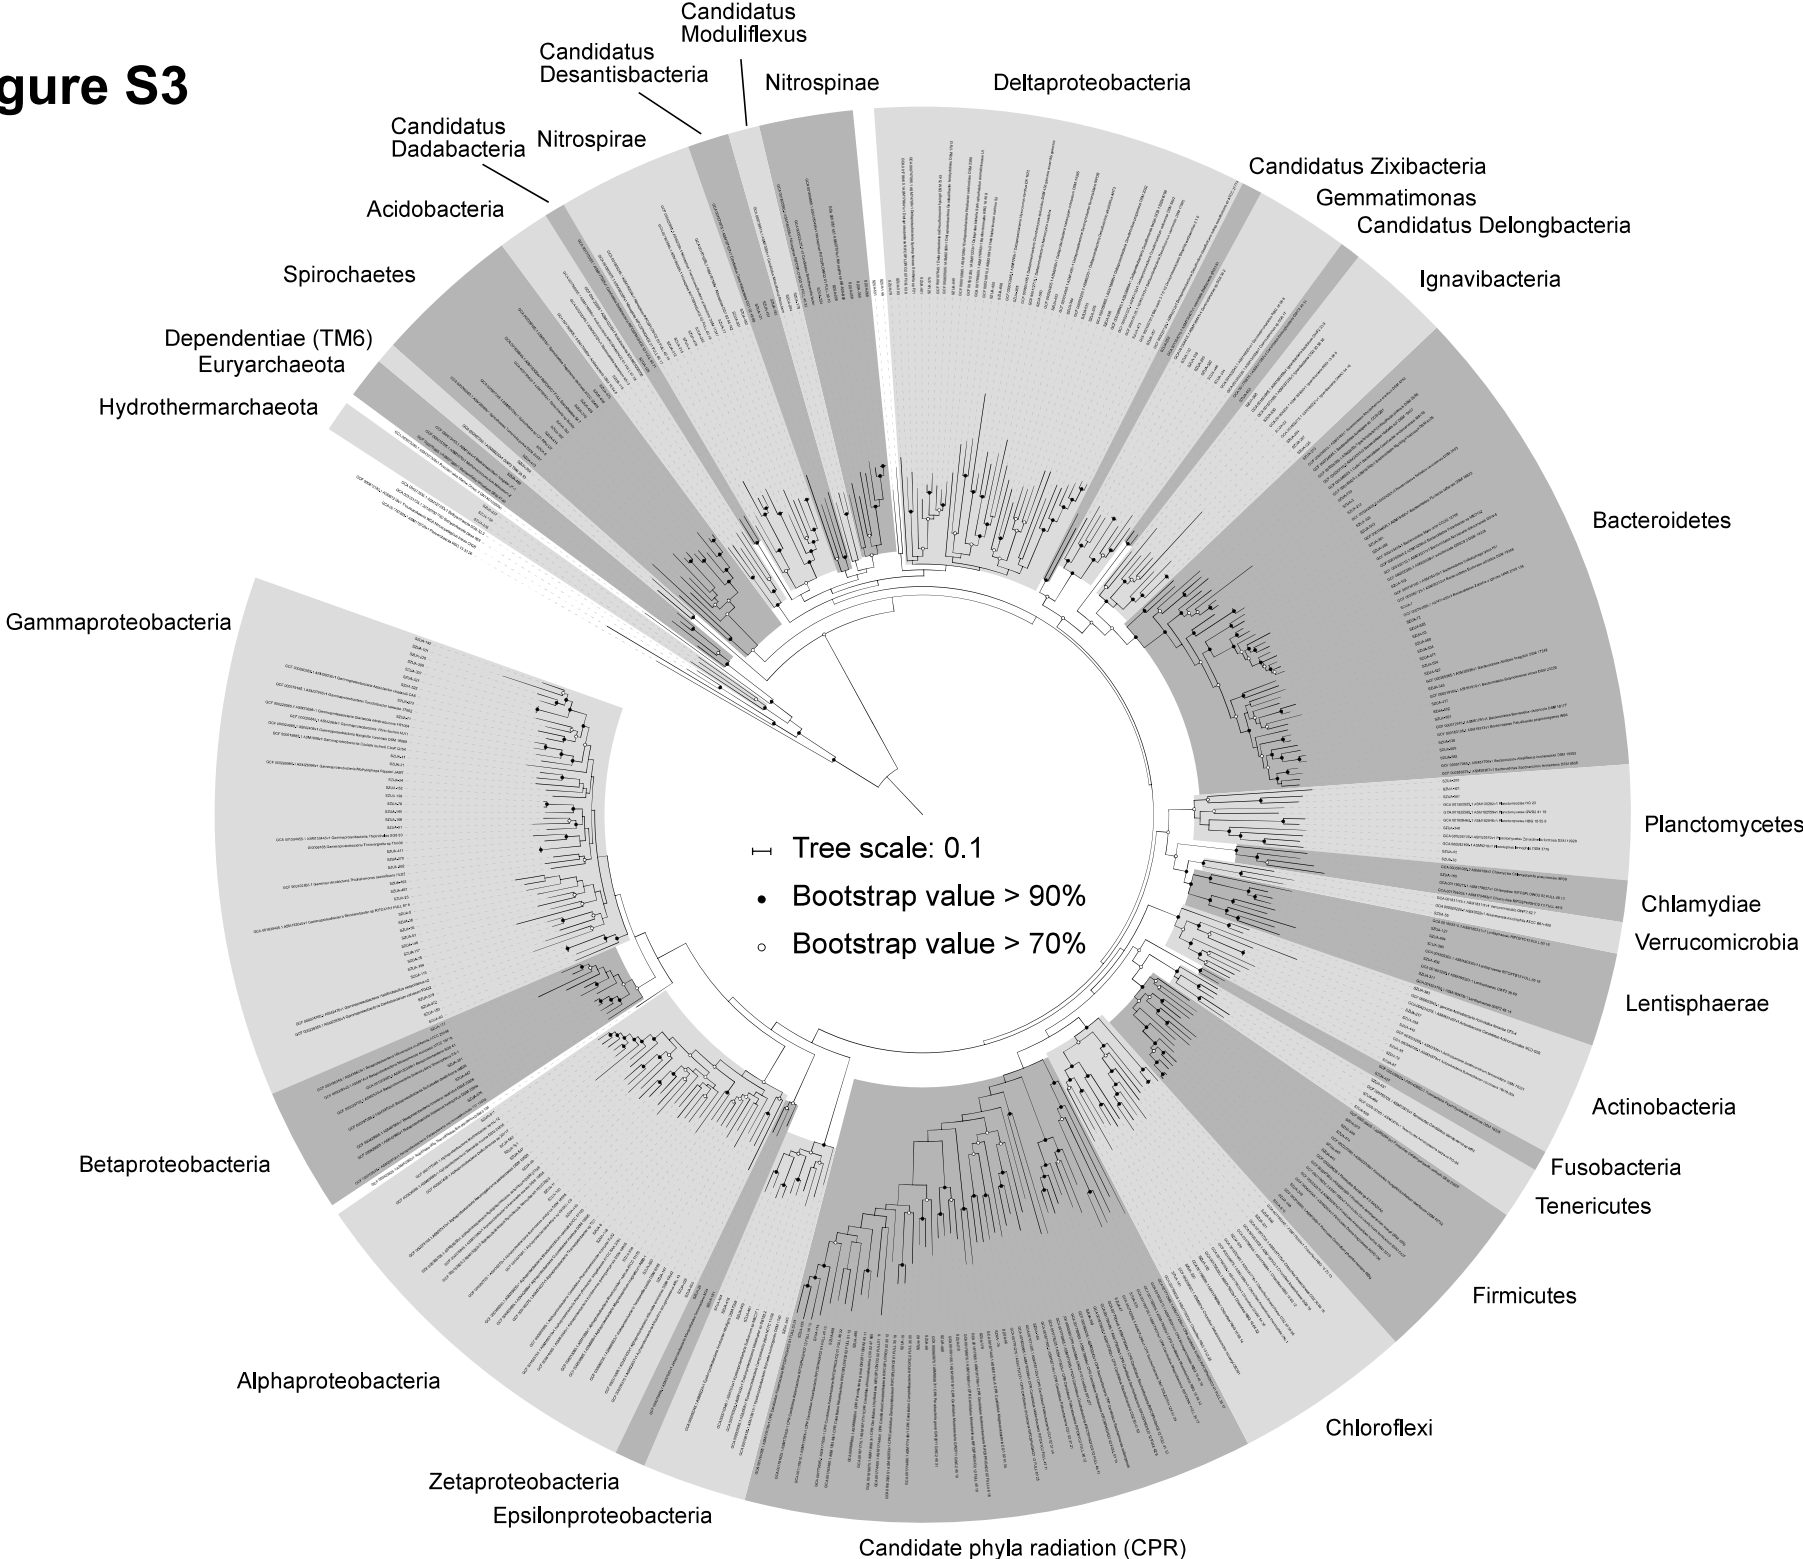

# Figure S4

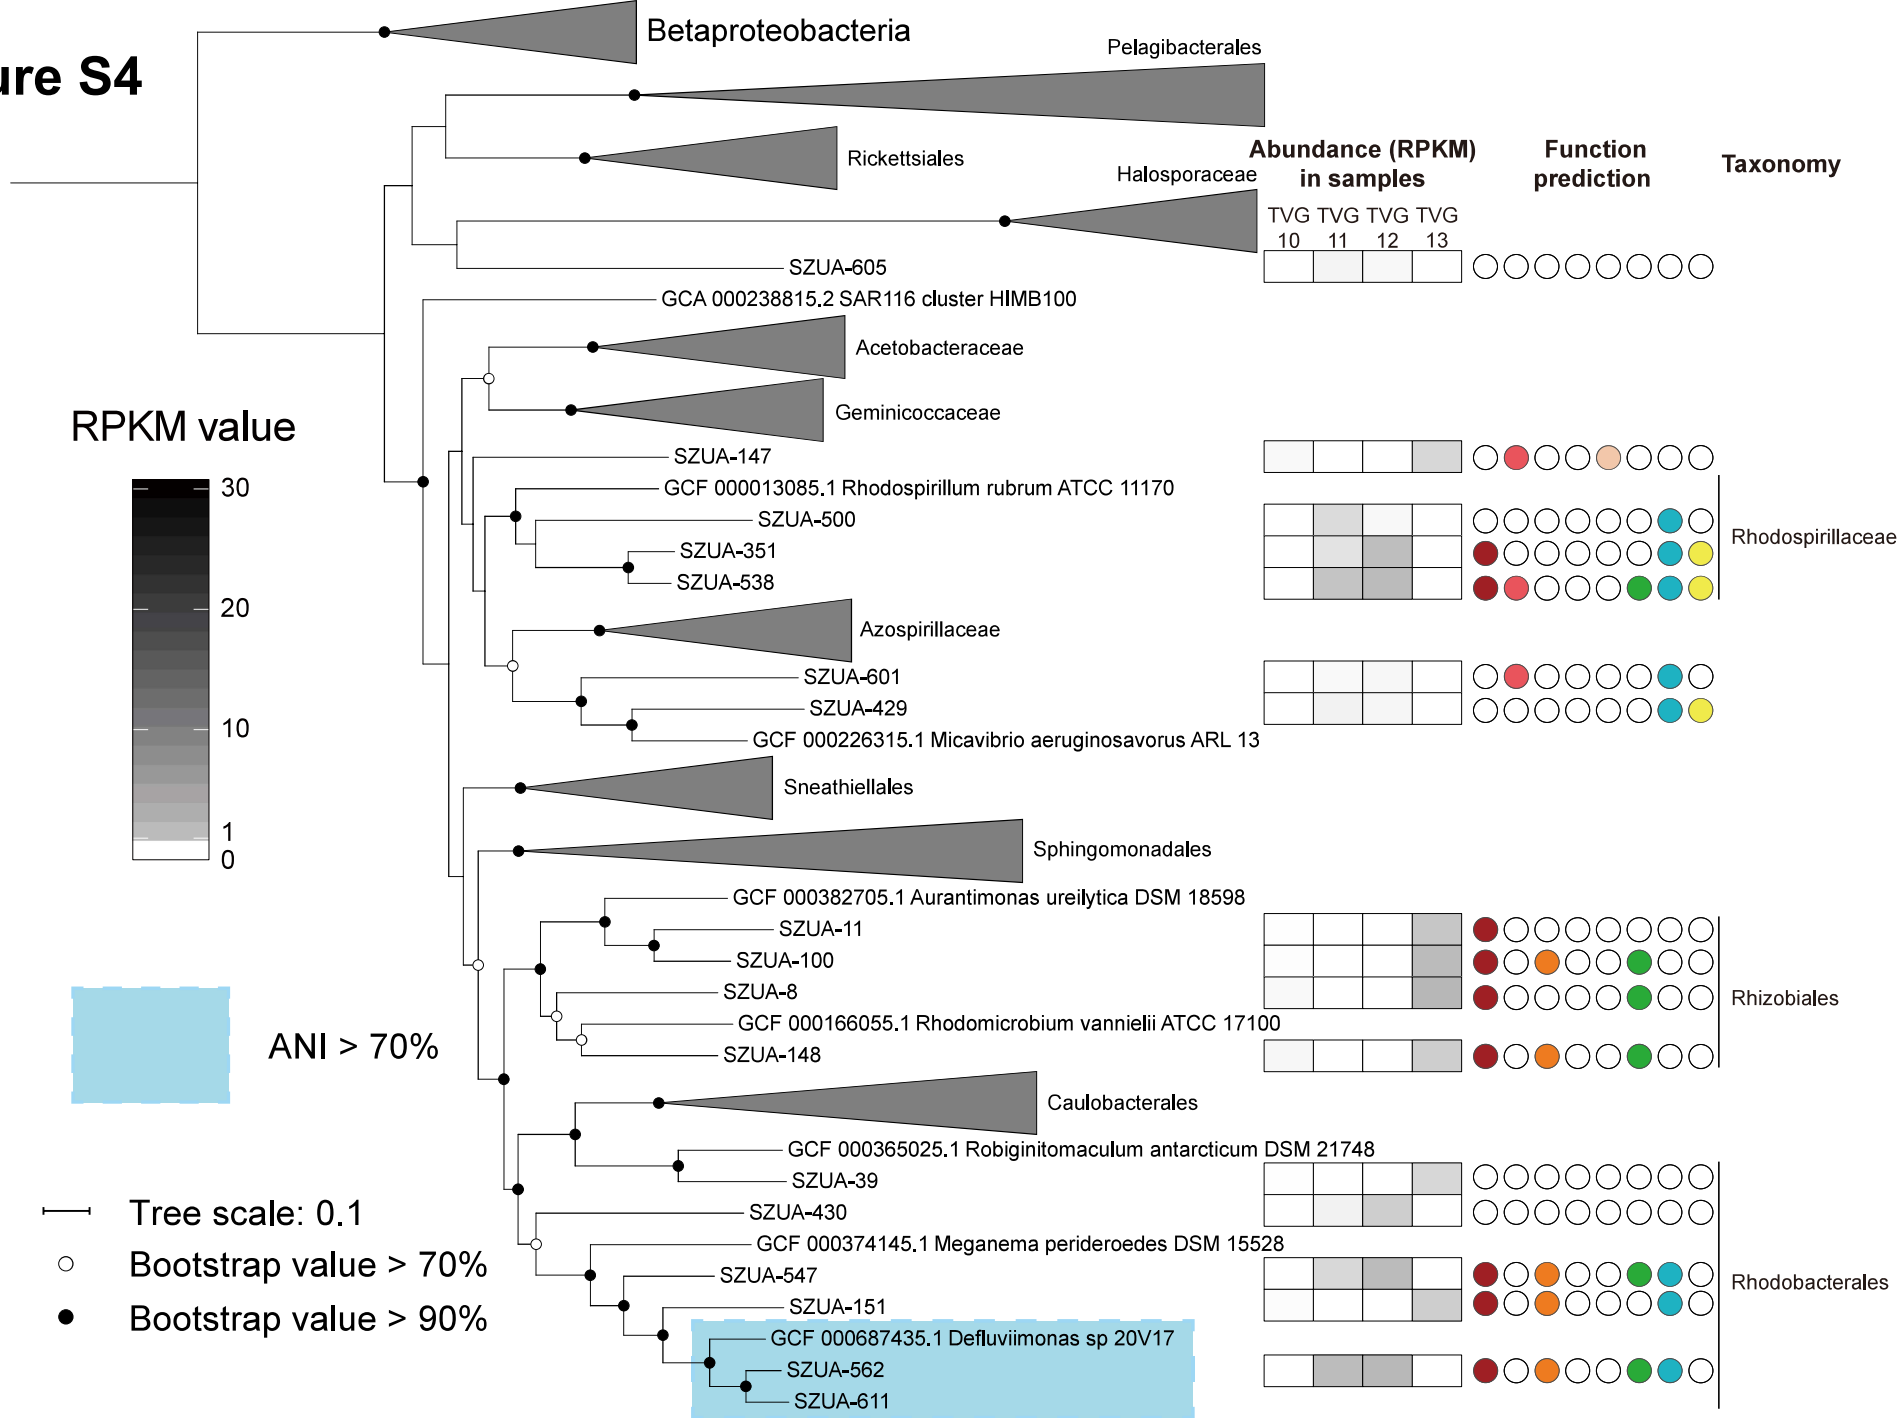



# Figure S5

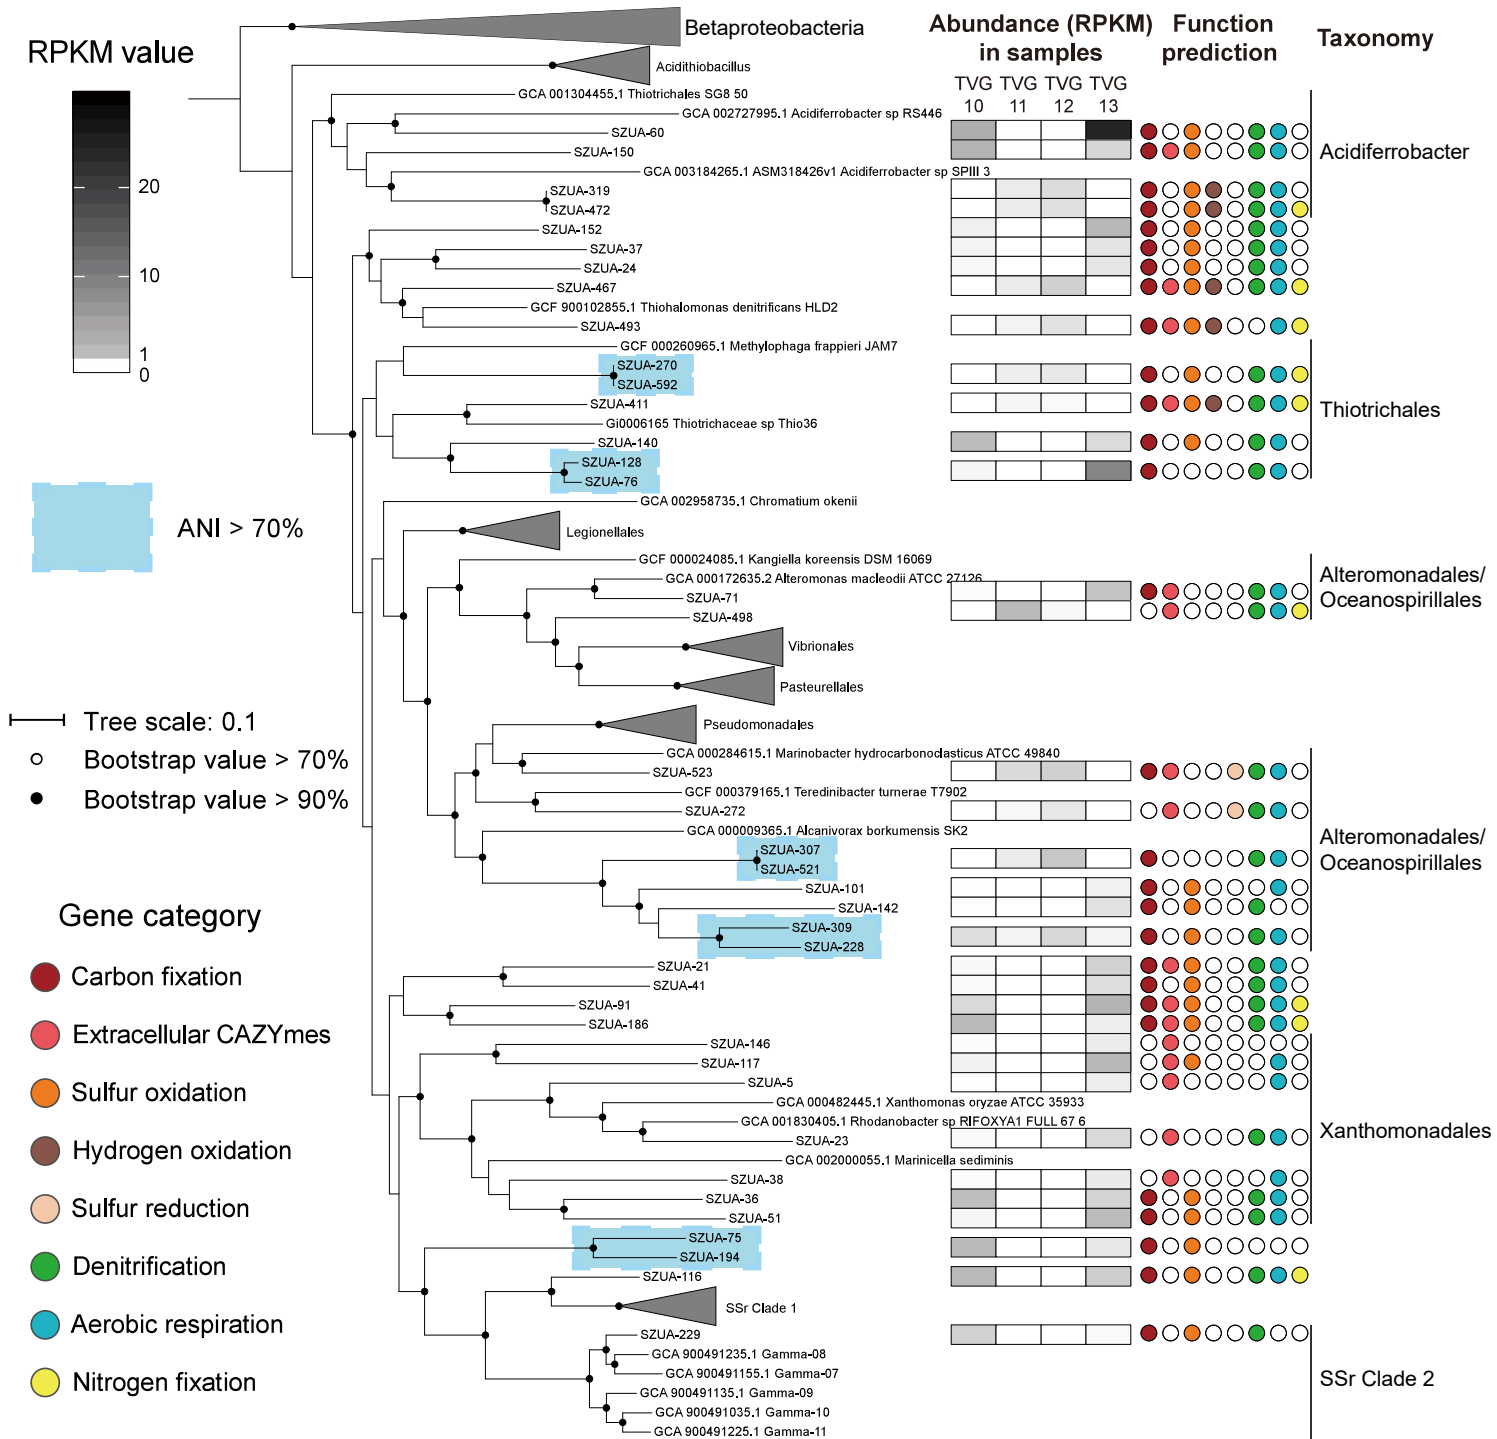

# Figure S6

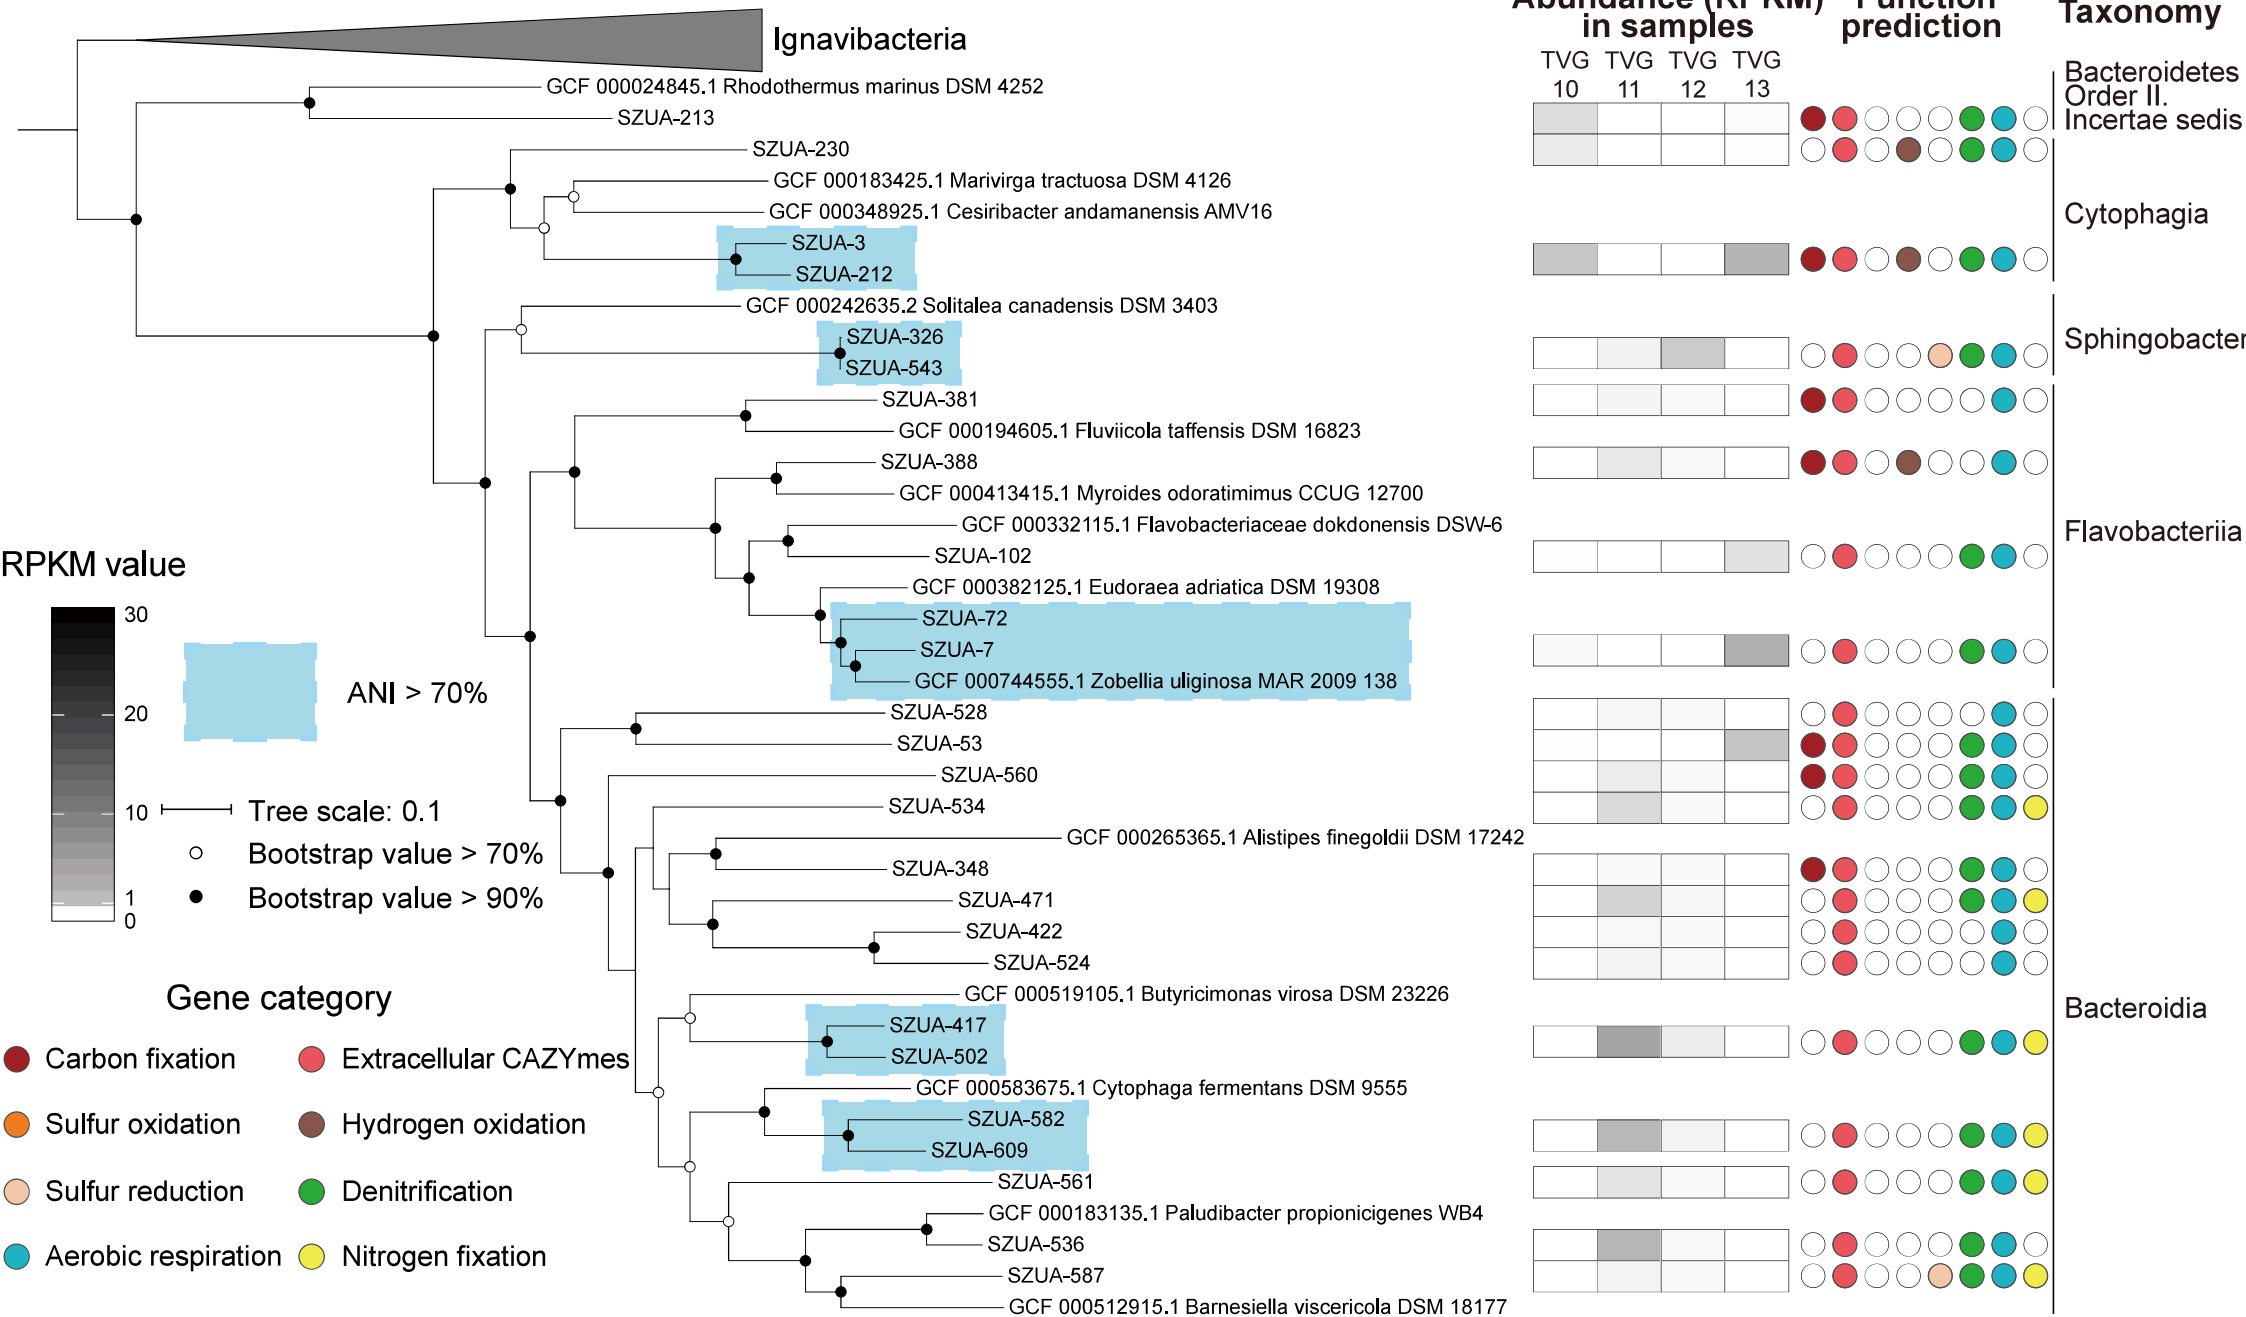

**Figure S7**

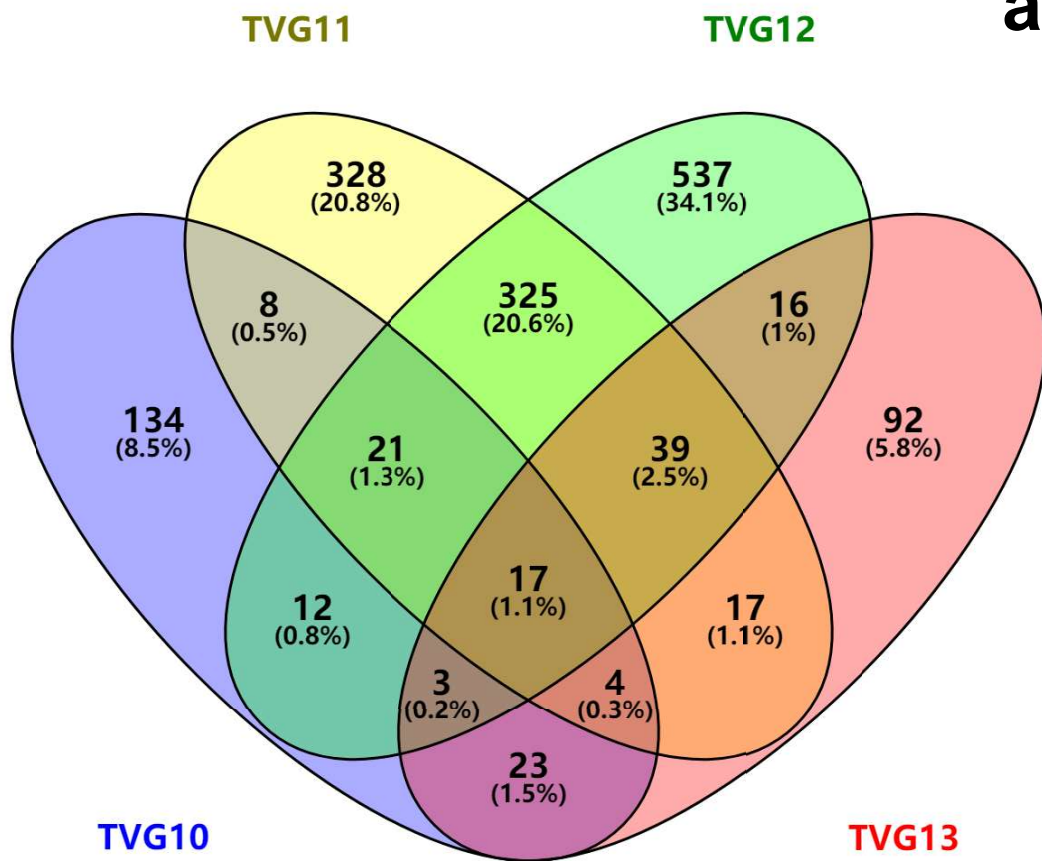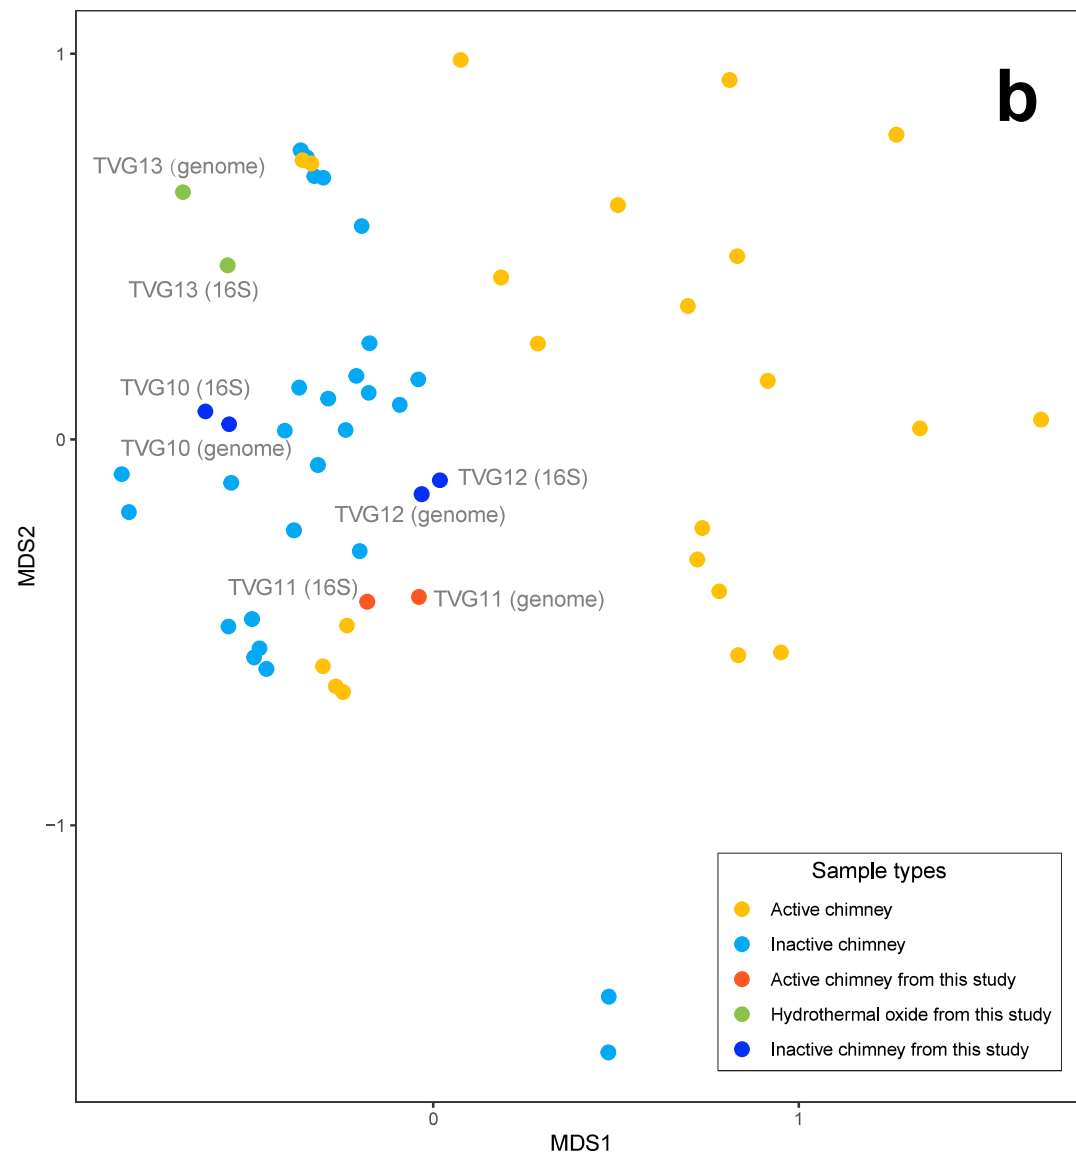

**Figure S8**

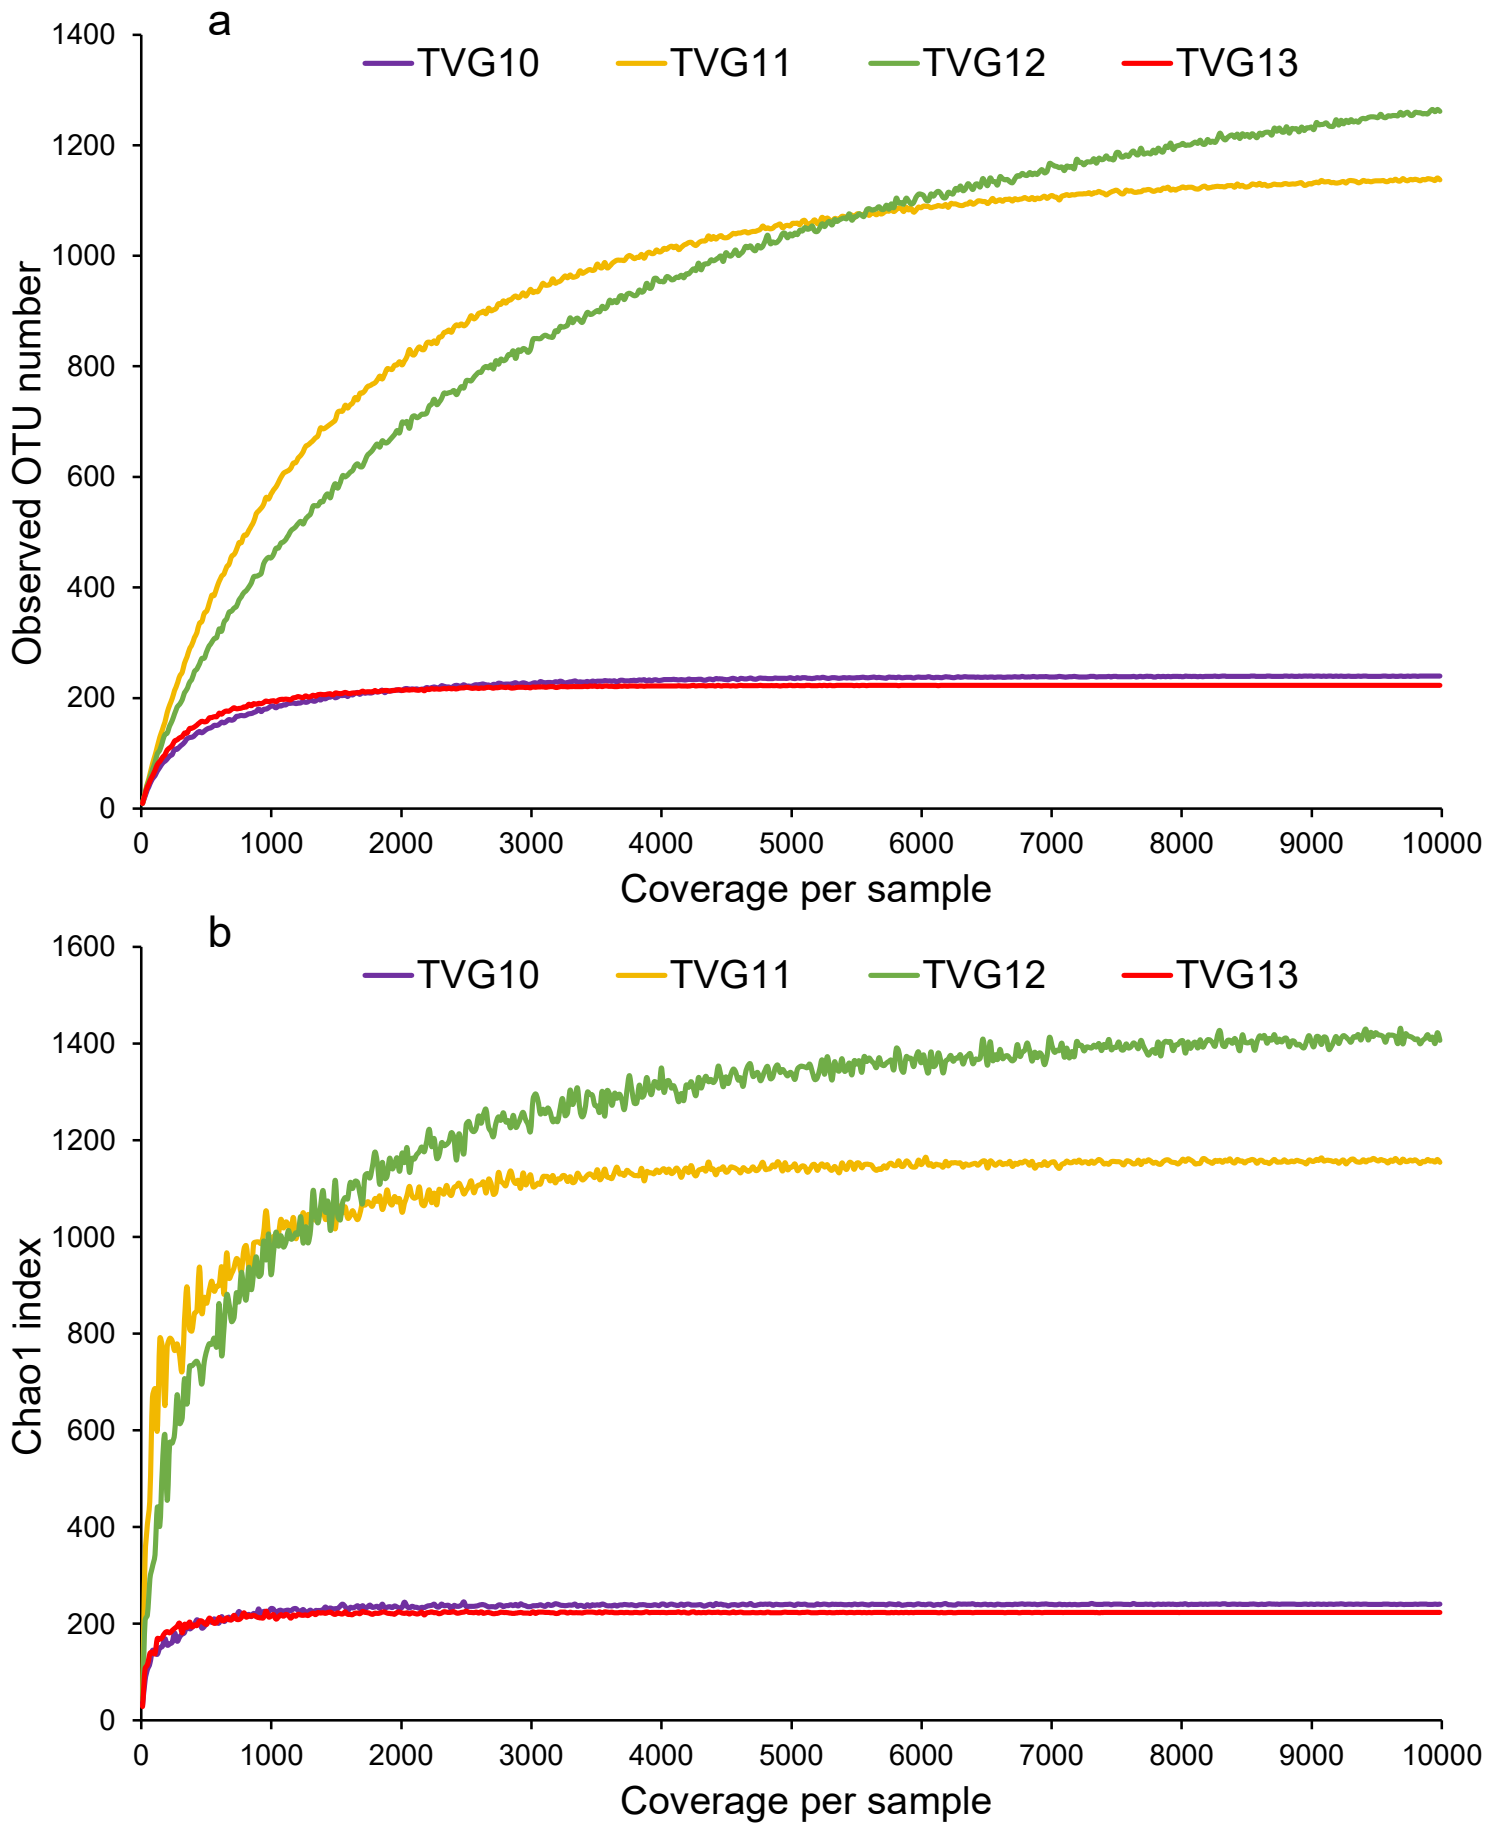





# Figure S10

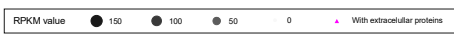

## Glycoside hydrolase

## Polysaccharide lyase Carbohydrate esterase

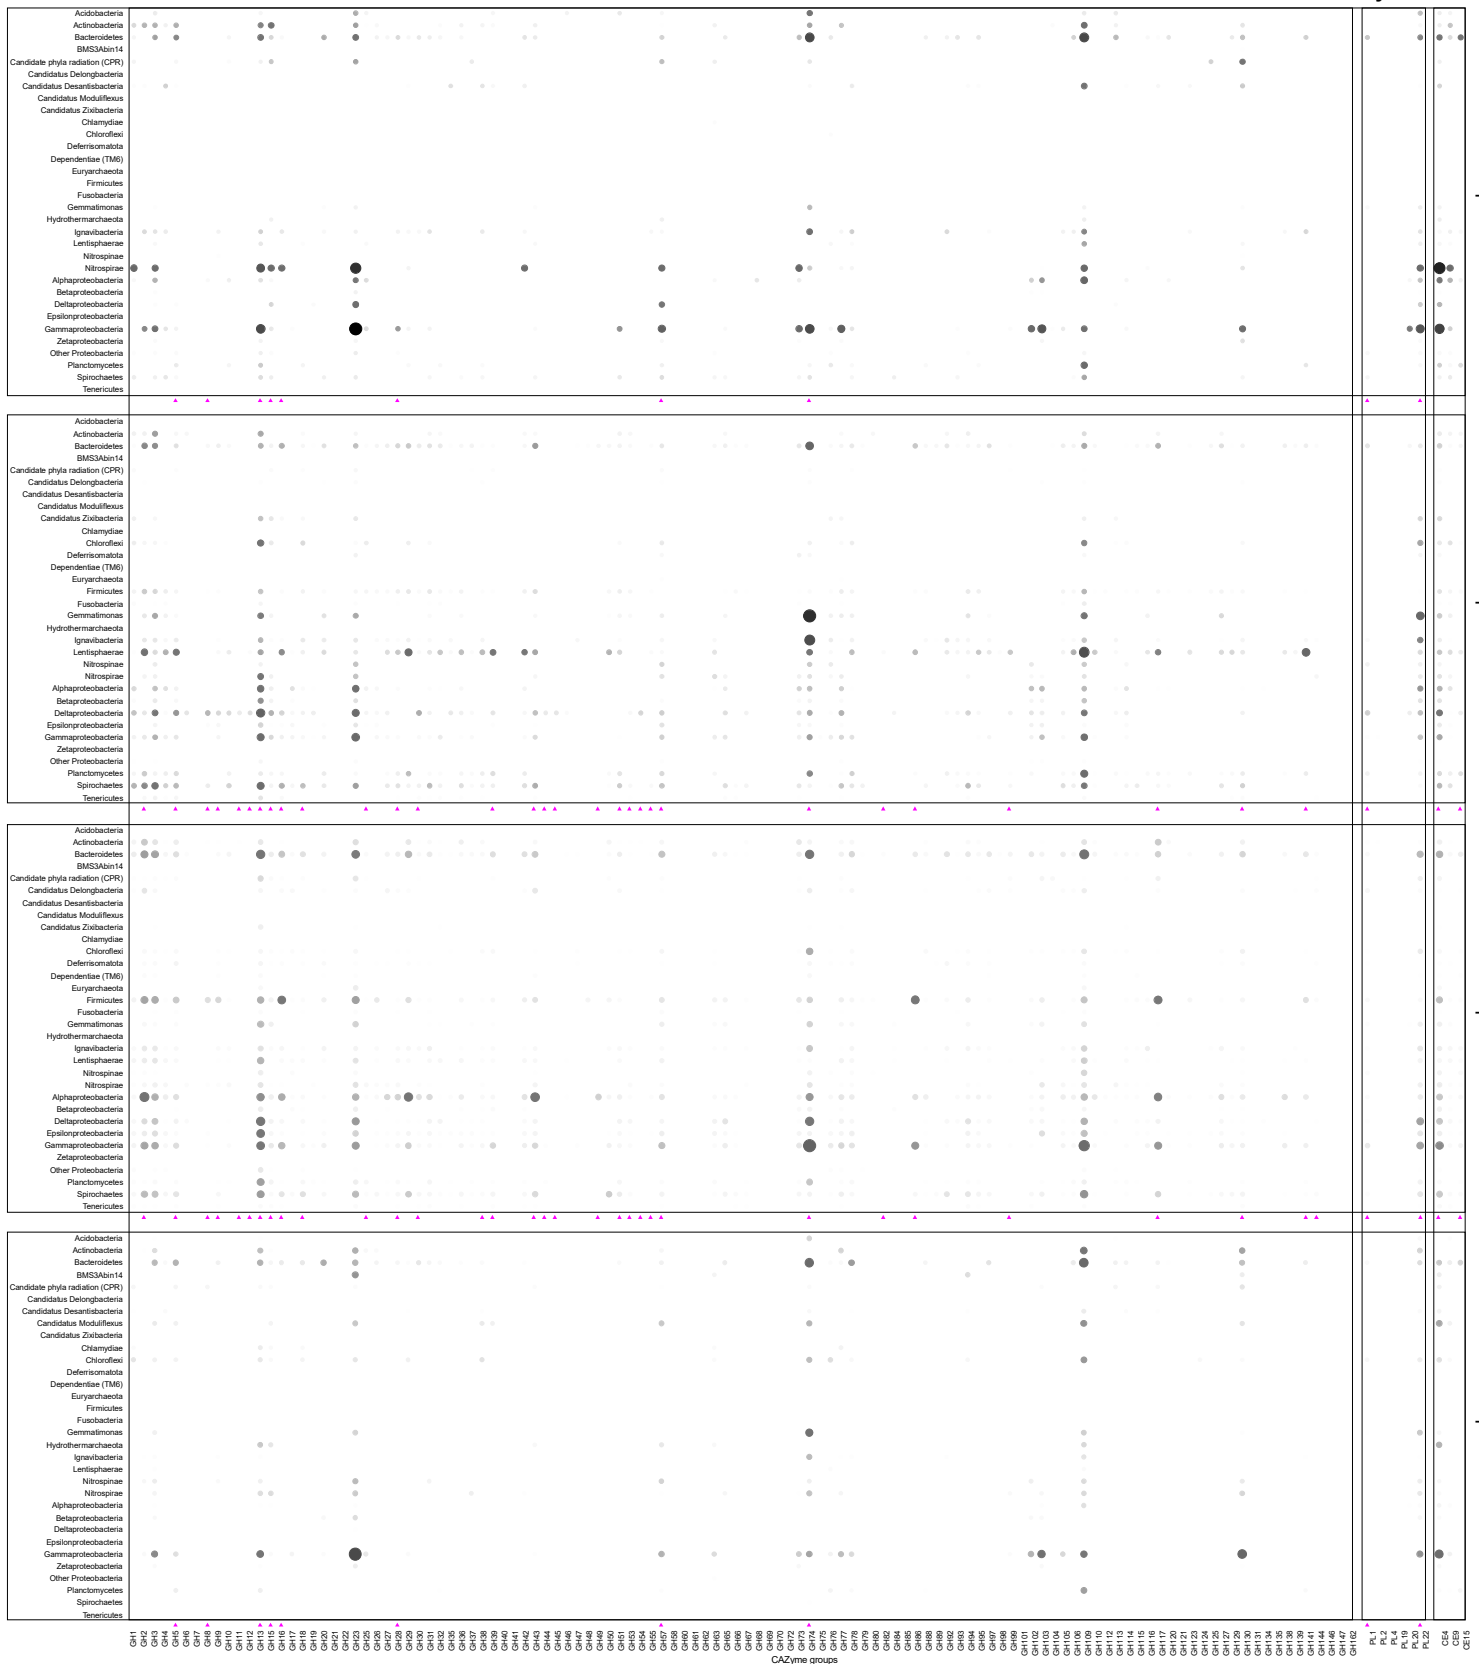

TVG10

TVG11

TVG12

TVG13

# Figure S11

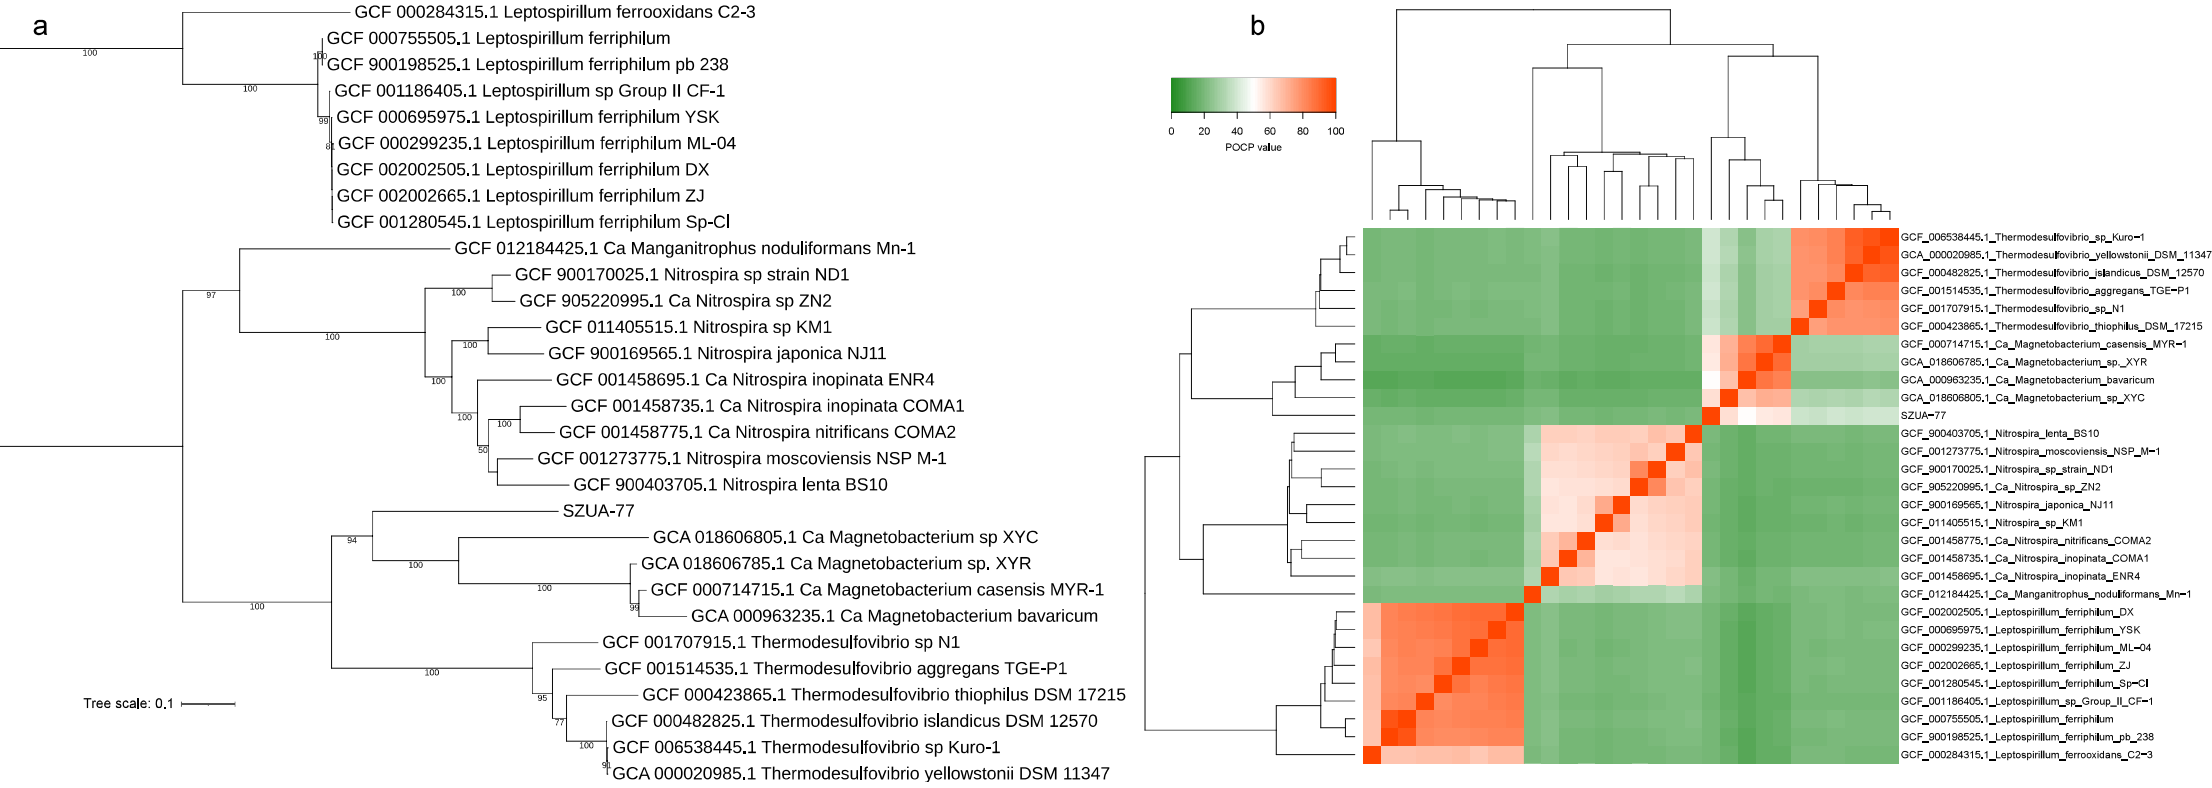

a

Figure S12

| Methods | Command settings                                     |
|---------|------------------------------------------------------|
| bin1    | --minContig 2500                                     |
| bin2    | --minContig 2500 --verysensitive                     |
| bin3    | --minContig 1500                                     |
| bin4    | --minContig 1500 --verysensitive                     |
| bin5    | --minContig 1500 --verysensitive -B 20               |
| bin6    | --minContig 1500 -B 20 --specific                    |
| bin7    | --minContig 1500 -B 20 --specific --pB 20            |
| bin8    | --minContig 1500 -B 20 --specific --pB 5             |
| bin9    | --minContig 2500 --superspecific                     |
| bin10   | --minContig 2500 --superspecific -B 20               |
| bin11   | --minContig 2500 --superspecific -B 20 --pB 20       |
| bin12   | --minContig 2500 --superspecific -B 20 --pB 5 --very |

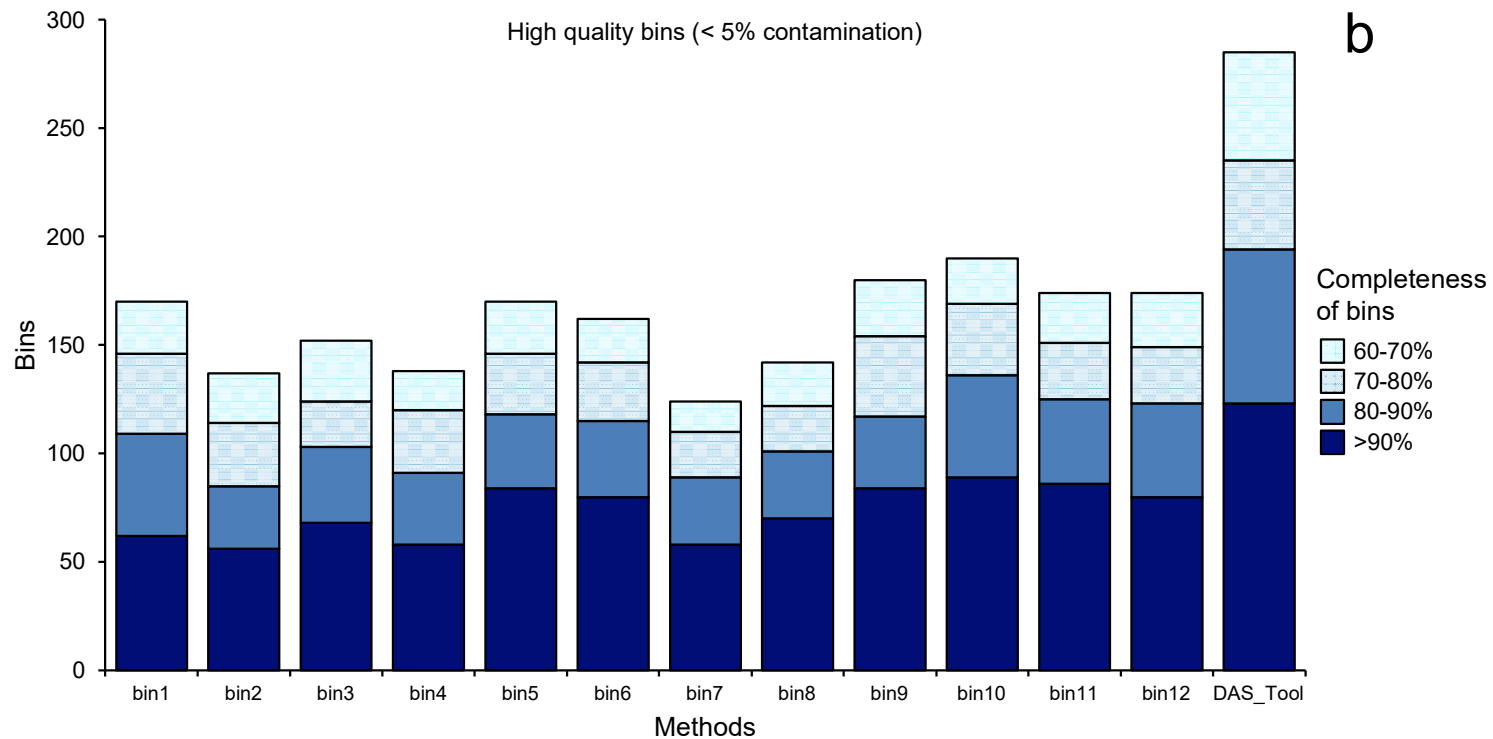



# Figure S13

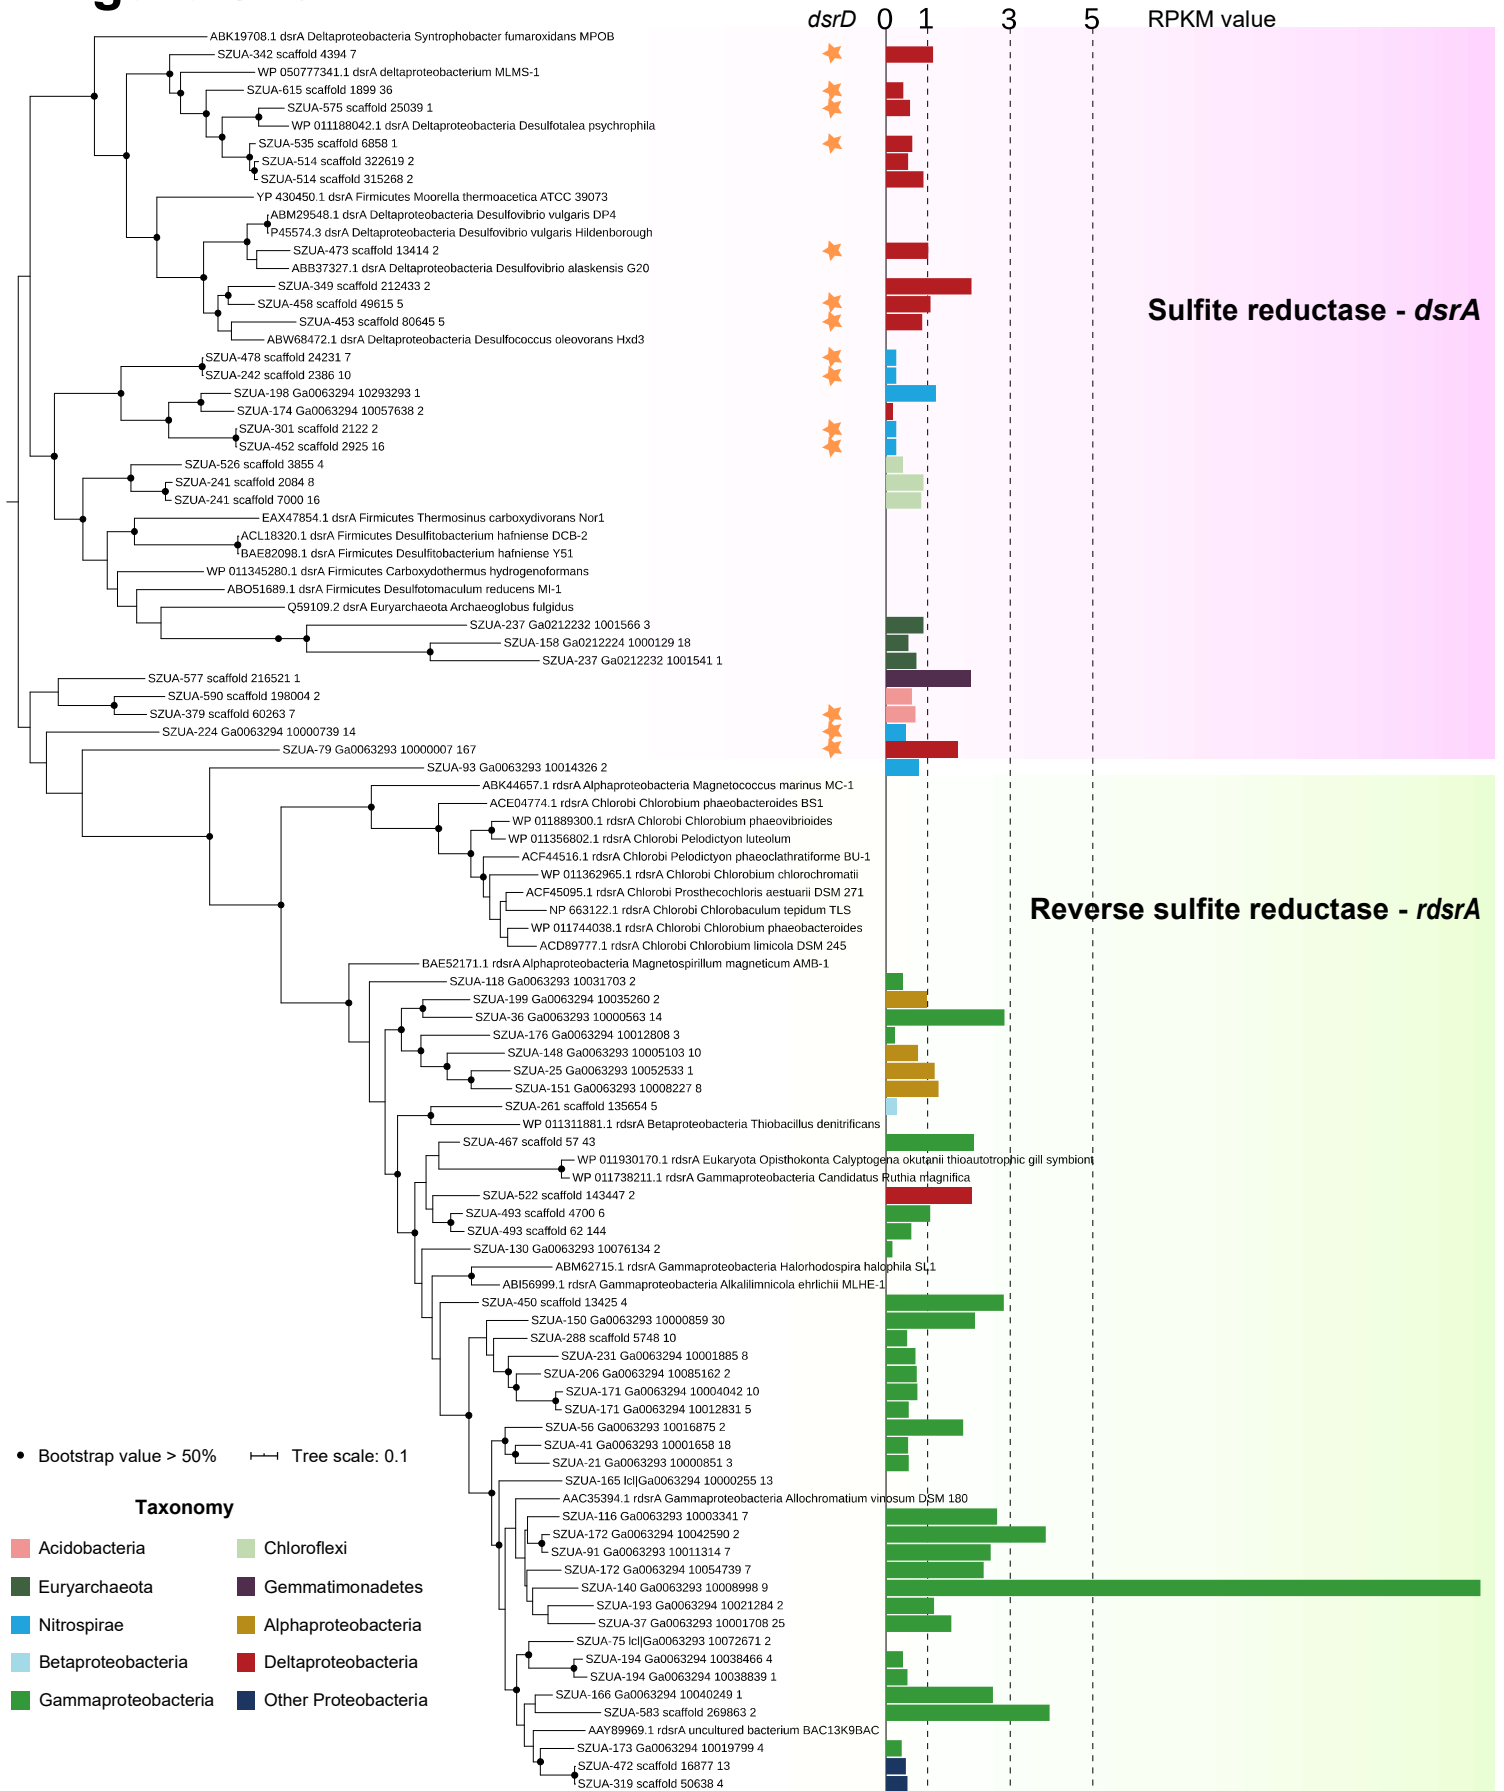

Supplement: 40168_2021_1202_MOESM3_ESM.pdf [file 40168_2021_1202_MOESM3_ESM.pdf]
